# Supplementary material for: Dynamics of necroptosis in kidney ischemia-reperfusion injury
Source: PubMed Central journal article supplement (PMC10652410; doi:10.3389/fimmu.2023.1251452), 2023-11-02

Suppl Fig 1

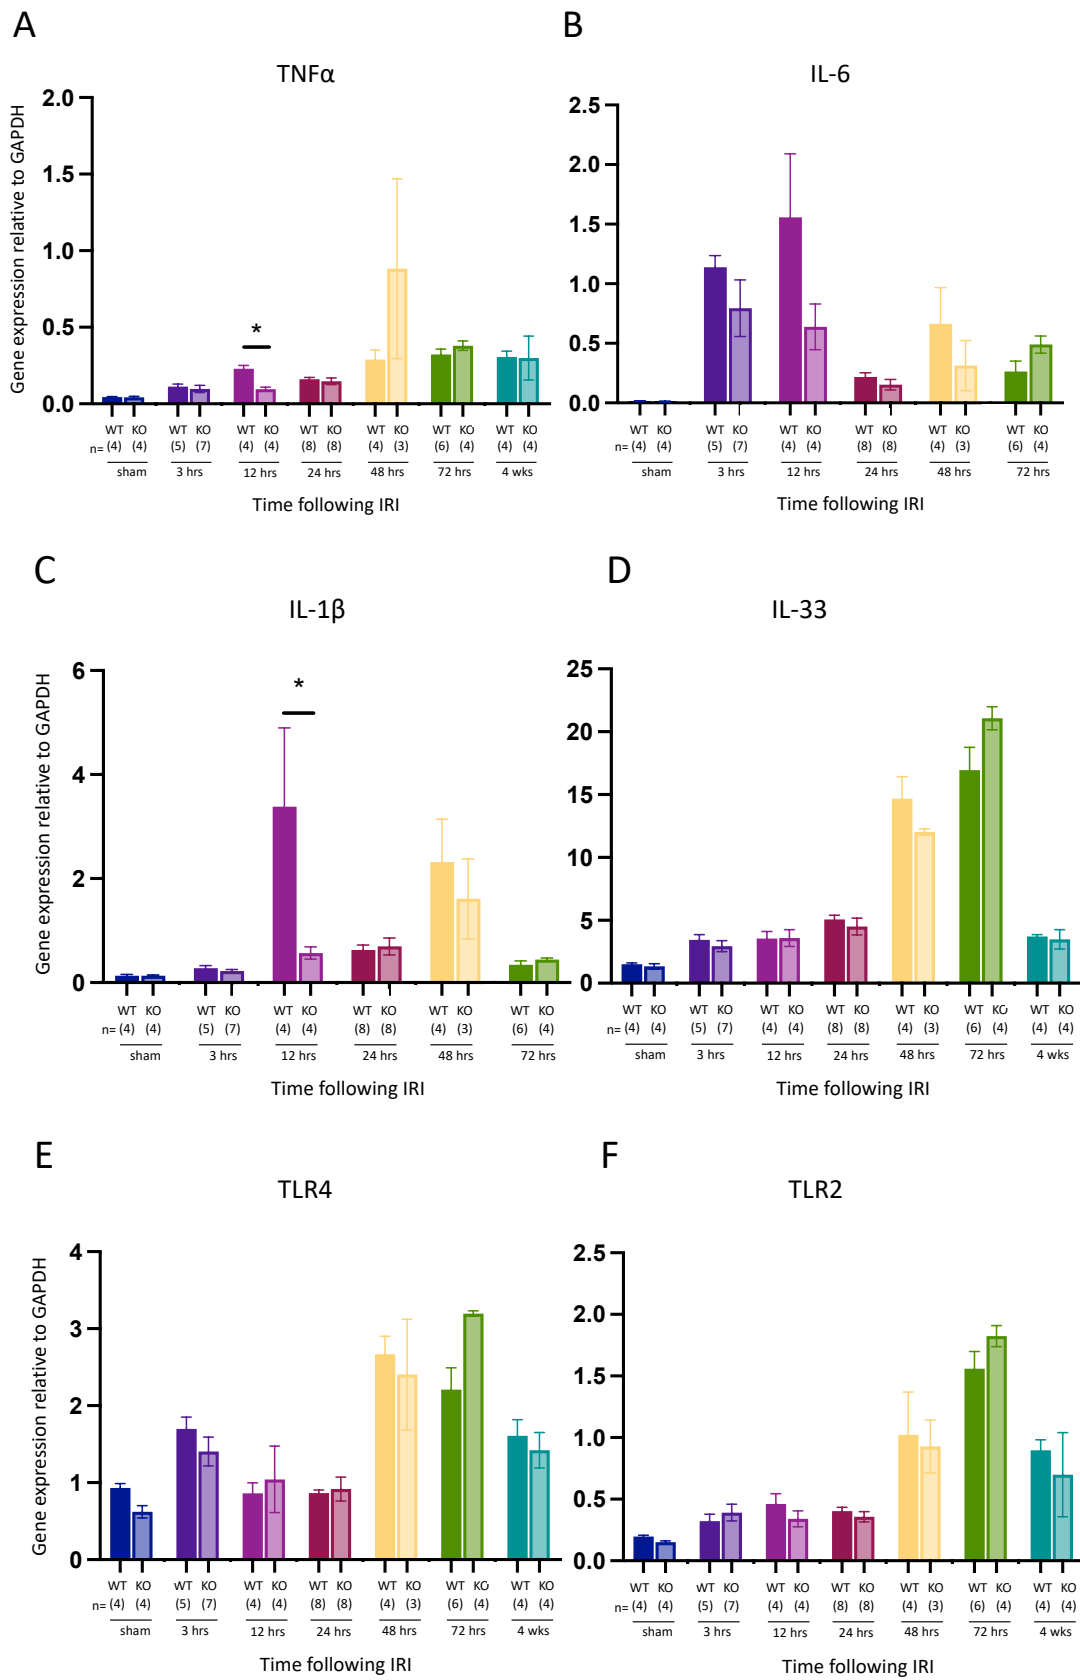

**G**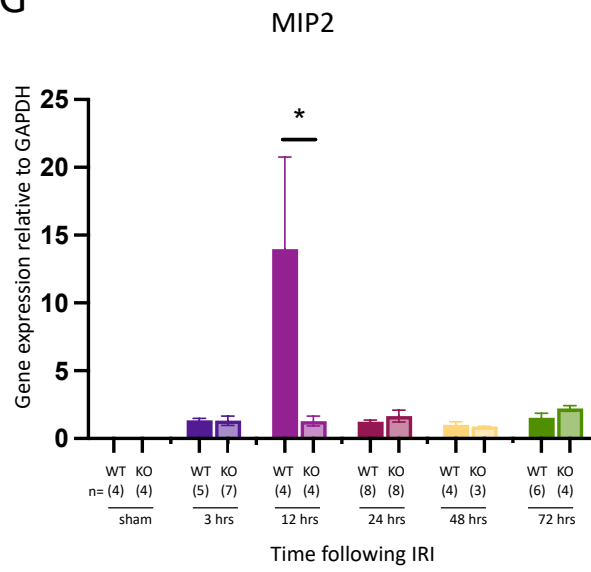**H**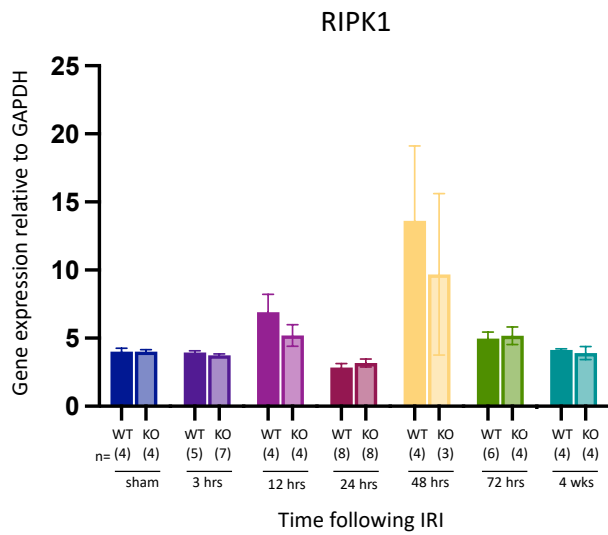**I**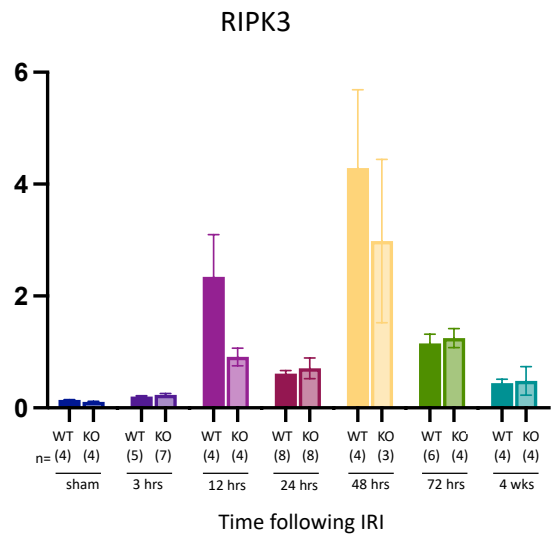

Supplement: Image_1.pdf [file Image_1.pdf]
